# Supplementary material
Source: publisher figshare collection journal article supplement (https://frontiersin.figshare.com/ndownloader/files/22124028)
Supplement: Supplementary file 1 [file 22124028]

Supplementary Table 1 : SIMPER comparison of late summer and early spring catches (ln (X+1) transformed) by sets that fished to 1,250 m depth or deeper (A: numbers, B: weight, in grams)

| **A** | **Summer**  Average Similarity = 77.06 | | | | **Spring**  Average Similarity = 83.96 | | | | **Comparison**  Average Dissimilarity = 28.42 | | |
| --- | --- | --- | --- | --- | --- | --- | --- | --- | --- | --- | --- |
| **Species:** | Average | Average Similarity | Sim / SD | Contribution (%) | Average | Average Similarity | Sim / SD | Contribution (%) | Average Dissimilarity | Diss / SD | Contribution (%) |
| *N. scolopaceus* | 2.40 | 4.79 | 2.98 | 6.21 | 2.92 | 8.95 | 8.91 | 10.66 | 1.03 | 1.04 | 3.62 |
| *Serrivom. beanii* | 3.43 | 7.49 | 8.33 | 9.72 | 4.07 | 12.08 | 9.30 | 14.39 | 1.20 | 1.37 | 4.24 |
| *E. pelecanoides* | 1.66 | 3.20 | 2.44 | 4.15 | 1.68 | 4.45 | 2.95 | 5.30 | 0.89 | 1.29 | 3.12 |
| *B. euryops* | 2.68 | 5.71 | 5.05 | 7.42 | 2.88 | 8.87 | 8.81 | 10.56 |  |  |  |
| *C. sloani* | 3.10 | 6.63 | 6.30 | 8.60 | 3.32 | 9.90 | 10.10 | 11.79 | 0.91 | 1.21 | 3.19 |
| *M. niger* | 1.38 | 2.43 | 1.57 | 3.16 | 1.60 | 4.31 | 3.54 | 5.14 | 0.93 | 1.29 | 3.28 |
| *S. boa* | 3.25 | 7.23 | 5.59 | 9.39 | 1.85 | 5.17 | 5.26 | 6.16 | 1.99 | 2.10 | 6.98 |
| *A. risso* | 2.48 | 5.16 | 4.50 | 6.69 | 1.35 |  |  |  | 1.90 | 1.63 | 6.70 |
| *B. glaciale* | 6.04 | 13.80 | 7.63 | 17.91 | 5.59 | 17.25 | 17.22 | 20.54 | 1.09 | 1.39 | 3.83 |
| *C. maderensis* | 1.64 | 2.41 | 1.26 | 3.12 | 0.43 |  |  |  | 1.84 | 1.42 | 6.48 |
| *H. hygomii* | 1.90 |  |  |  | 0 |  |  |  | 2.48 | 1.03 | 8.71 |
| *L. macdonaldi* | 1.17 |  |  |  | 0.39 |  |  |  | 1.69 | 1.33 | 5.94 |
| *L. dofleini* | 1.77 |  |  |  | 0 |  |  |  | 2.30 | 0.98 | 8.10 |
| *M. punctatum* | 1.64 | 2.58 | 1.16 | 3.34 | 0.11 |  |  |  | 2.25 | 1.48 | 7.91 |
| *N. kroyeri* | 1.45 |  |  |  | 0.14 |  |  |  | 1.90 | 1.14 | 6.69 |
| *N. resplendens* | 1.90 | 2.03 | 0.74 | 2.63 | 0 |  |  |  | 2.53 | 1.12 | 8.89 |
| *Scopelo. beanii* | 3.23 | 6.39 | 3.28 | 8.30 | 2.81 | 8.13 | 5.24 | 9.68 | 1.37 | 1.52 | 4.82 |
| *A. cornuta* | 0.48 |  |  |  | 0.66 |  |  |  |  |  |  |
| *M. atlanticum* | 0.30 |  |  |  | 0.39 |  |  |  |  |  |  |

| **B** | **Summer**  Average Similarity = 81.35 | | | | **Spring**  Average Similarity = 85.67 | | | | **Comparison**  Average Dissimilarity = 23.27 | | |
| --- | --- | --- | --- | --- | --- | --- | --- | --- | --- | --- | --- |
| **Species:** | Average | Average Similarity | Sim / SD | Contribution (%) | Average | Average Similarity | Sim / SD | Contribution (%) | Average Dissimilarity | Diss / SD | Contribution (%) |
| *N. scolopaceus* | 4.90 | 6.38 | 4.73 | 7.85 | 5.31 | 9.13 | 9.64 | 10.66 | 0.75 | 1.13 | 3.24 |
| *Serrivom. beanii* | 6.37 | 8.88 | 12.39 | 10.91 | 6.62 | 11.41 | 12.34 | 13.32 |  |  |  |
| *E. pelecanoides* | 4.26 | 5.26 | 2.94 | 6.47 | 4.21 | 6.30 | 3.47 | 7.36 | 1.13 | 1.31 | 4.85 |
| *B. euryops* | 4.96 | 6.74 | 11.04 | 8.29 | 5.39 | 9.44 | 14.80 | 11.02 |  |  |  |
| *C. sloani* | 5.89 | 8.22 | 11.43 | 10.10 | 6.03 | 10.62 | 21.00 | 12.40 |  |  |  |
| *M. niger* | 3.83 | 4.42 | 1.84 | 5.44 | 4.27 | 7.17 | 8.29 | 8.37 | 0.99 | 1.03 | 4.27 |
| *S. boa* | 5.75 | 7.92 | 8.75 | 9.74 | 3.98 | 6.69 | 7.75 | 7.81 | 1.46 | 2.15 | 6.26 |
| *A. risso* | 3.18 | 4.11 | 6.04 | 5.05 | 1.07 |  |  |  | 1.75 | 2.12 | 7.50 |
| *B. glaciale* | 6.49 | 9.12 | 11.62 | 11.21 | 5.56 | 9.52 | 13.34 | 11.11 | 0.85 | 1.59 | 3.67 |
| *C. maderensis* | 2.05 | 1.89 | 1.28 | 2.32 | 0.71 |  |  |  | 1.33 | 1.44 | 5.73 |
| *H. hygomii* | 2.17 |  |  |  | 0 |  |  |  | 1.73 | 1.03 | 7.45 |
| *L. macdonaldi* | 2.49 | 2.10 | 0.86 | 2.58 | 0.79 |  |  |  | 1.93 | 1.33 | 8.28 |
| *L. dofleini* | 1.45 |  |  |  | 0 |  |  |  | 1.15 | 0.95 | 4.96 |
| *M. punctatum* | 2.00 |  |  |  | 0.14 |  |  |  | 1.59 | 1.31 | 6.83 |
| *N. kroyeri* | 1.45 |  |  |  | 0.50 |  |  |  | 1.18 | 1.22 | 5.09 |
| *N. resplendens* | 1.97 |  |  |  | 0 |  |  |  | 1.59 | 1.11 | 6.82 |
| *Scopelo. beanii* | 6.29 | 8.20 | 4.73 | 10.08 | 5.10 | 8.57 | 12.86 | 10.01 | 1.27 | 1.58 | 5.44 |
| *A. cornuta* | 2.44 |  |  |  | 3.61 |  |  |  | 2.03 | 1.21 | 8.72 |
| *M. atlanticum* | 0.62 |  |  |  | 0.95 |  |  |  | 0.95 | 0.96 | 4.08 |

Similarities and dissimilarities are presented only for those species which contributed to 90% of the respective total.

Supplementary Table 2 : Average catches, in numbers and
weights (grams) (both ln (X+1) transformed) taken by sets
that fished to 1,250 m depth or deeper in 2007 or 2009

|  | **Numbers** | | **Weights** | |
| --- | --- | --- | --- | --- |
|  | 2007 | 2009 | 2007 | 2009 |
| **Species:** | Average | Average | Average | Average |
| *N. scolopaceus* | 1.90 | 2.80 | 4.53 | 5.29 |
| *Serrivom. beanii* | 3.17 | 3.92 | 6.10 | 6.79 |
| *E. pelecanoides* | 1.68 | 1.80 | 4.24 | 4.89 |
| *B. euryops* | 2.40 | 3.11 | 4.63 | 5.44 |
| *C. sloani* | 2.64 | 3.51 | 5.63 | 6.22 |
| *M. niger* | 1.42 | 0.96 | 4.30 | 2.79 |
| *S. boa* | 3.18 | 3.38 | 5.68 | 5.91 |
| *A. risso* | 2.40 | 2.44 | 3.24 | 3.24 |
| *B. glaciale* | 6.12 | 6.28 | 6.59 | 6.67 |
| *C. maderensis* | 1.30 | 1.73 | 1.65 | 2.18 |
| *H. hygomii* | 0.84 | 2.64 | 0.98 | 2.97 |
| *L. macdonaldi* | 0.85 | 1.22 | 1.86 | 2.64 |
| *L. dofleini* | 0.54 | 3.51 | 0.46 | 2.89 |
| *M. punctatum* | 2.10 | 1.14 | 2.75 | 1.40 |
| *N. kroyeri* | 1.21 | 1.49 | 1.27 | 1.48 |
| *N. resplendens* | 1.10 | 2.21 | 1.21 | 2.16 |
| *Scopelo. beanii* | 2.50 | 3.98 | 5.34 | 7.27 |
| *A. cornuta* | 0.46 | 0.69 | 2.41 | 3.22 |
| *M. atlanticum* | 0.30 | 0.19 | 0.85 | 0.29 |

Supplementary Table 3 : SIMPER comparison of catches (ln (X+1) transformed)
on the Main and Deep stations by sets that fished to 1,250 m depth or deeper
(A: numbers, B: weight, in grams)

| **A** | **Main Station**  Average Similarity = 78.39 | | | | **Deep Station**  Average Similarity = 76.94 | | | | **Comparison**  Average Dissimilarity = 25.89 | | |
| --- | --- | --- | --- | --- | --- | --- | --- | --- | --- | --- | --- |
| **Species:** | Average | Average Similarity | Sim / SD | Contribution (%) | Average | Average Similarity | Sim / SD | Contribution (%) | Average Dissimilarity | Diss / SD | Contribution (%) |
| *N. scolopaceus* | 2.51 | 5.55 | 2.30 | 7.09 | 2.64 | 6.05 | 4.55 | 7.87 | 1.01 | 1.19 | 3.90 |
| *Serrivom. beanii* | 3.21 | 8.27 | 5.69 | 10.55 | 3.86 | 8.62 | 5.45 | 11.21 | 1.06 | 1.28 | 4.11 |
| *E. pelecanoides* | 1.37 | 2.99 | 1.98 | 3.81 | 1.81 | 3.76 | 3.03 | 4.89 | 0.91 | 1.35 | 3.52 |
| *B. euryops* | 2.68 | 6.72 | 5.21 | 8.57 | 2.85 | 6.44 | 4.44 | 8.37 |  |  |  |
| *C. sloani* | 2.71 | 6.82 | 5.34 | 8.70 | 3.51 | 8.07 | 5.93 | 10.50 | 1.12 | 1.34 | 4.31 |
| *M. niger* | 1.65 | 3.81 | 2.87 | 4.86 | 1.34 | 2.40 | 1.42 | 3.12 | 0.92 | 1.29 | 3.57 |
| *S. boa* | 3.05 | 7.33 | 3.55 | 9.35 | 2.87 | 5.82 | 4.71 | 7.57 | 1.17 | 1.20 | 4.52 |
| *A. risso* | 2.05 | 4.93 | 3.81 | 6.28 | 2.20 | 3.81 | 1.75 | 4.95 | 1.23 | 1.28 | 4.74 |
| *B. glaciale* | 5.90 | 15.58 | 9.02 | 19.87 | 5.94 | 13.69 | 7.05 | 17.79 | 0.91 | 1.32 | 3.52 |
| *C. maderensis* | 1.21 |  |  |  | 1.49 | 1.86 | 0.96 | 2.41 | 1.61 | 1.32 | 6.22 |
| *H. hygomii* | 0.53 |  |  |  | 1.86 |  |  |  | 2.26 | 1.09 | 8.74 |
| *L. macdonaldi* | 1.00 |  |  |  | 1.03 |  |  |  | 1.43 | 1.21 | 5.51 |
| *L. dofleini* | 0.27 |  |  |  | 2.04 | 1.79 | 0.58 | 2.33 | 2.43 | 1.06 | 9.40 |
| *M. punctatum* | 1.89 | 3.54 | 1.33 | 4.52 | 0.89 |  |  |  | 1.96 | 1.45 | 7.55 |
| *N. kroyeri* | 1.23 |  |  |  | 1.23 |  |  |  | 1.81 | 1.29 | 6.98 |
| *N. resplendens* | 0.83 |  |  |  | 1.58 |  |  |  | 2.08 | 1.12 | 8.03 |
| *Scopelo. beanii* | 2.48 | 5.75 | 3.44 | 7.33 | 3.71 | 8.29 | 8.62 | 10.77 | 1.70 | 1.69 | 6.57 |
| *A. cornuta* | 0.52 |  |  |  | 0.58 |  |  |  |  |  |  |
| *M. atlanticum* | 0.72 |  |  |  | 0.06 |  |  |  |  |  |  |

| **B** | **Main Station**  Average Similarity = 81.86 | | | | **Deep Station**  Average Similarity = 81.32 | | | | **Comparison**  Average Dissimilarity = 21.05 | | |
| --- | --- | --- | --- | --- | --- | --- | --- | --- | --- | --- | --- |
| **Species:** | Average | Average Similarity | Sim / SD | Contribution (%) | Average | Average Similarity | Sim / SD | Contribution (%) | Average Dissimilarity | Diss / SD | Contribution (%) |
| *N. scolopaceus* | 5.43 | 7.70 | 4.71 | 9.40 | 4.91 | 7.11 | 7.67 | 8.74 | 0.73 | 1.44 | 3.49 |
| *Serrivom. beanii* | 6.14 | 9.12 | 8.98 | 11.14 | 6.63 | 9.64 | 9.74 | 11.85 |  |  |  |
| *E. pelecanoides* | 3.52 | 4.36 | 2.26 | 5.33 | 4.63 | 6.23 | 4.75 | 7.66 | 1.15 | 1.23 | 5.46 |
| *B. euryops* | 4.87 | 7.13 | 8.26 | 8.71 | 5.28 | 7.60 | 7.18 | 9.35 |  |  |  |
| *C. sloani* | 5.69 | 8.45 | 9.52 | 10.33 | 6.11 | 8.98 | 8.85 | 11.05 |  |  |  |
| *M. niger* | 4.52 | 6.39 | 5.30 | 7.81 | 3.62 | 4.24 | 1.57 | 5.22 | 1.07 | 1.01 | 5.10 |
| *S. boa* | 5.63 | 7.84 | 5.06 | 9.58 | 5.18 | 7.10 | 8.26 | 8.73 | 0.94 | 1.41 | 4.47 |
| *A. risso* | 2.75 | 3.23 | 2.29 | 3.94 | 2.50 | 2.72 | 1.77 | 3.34 | 0.98 | 1.20 | 4.67 |
| *B. glaciale* | 6.27 | 9.07 | 10.29 | 11.08 | 6.22 | 8.95 | 11.68 | 11.01 | 0.60 | 1.27 | 2.84 |
| *C. maderensis* | 1.69 |  |  |  | 1.90 |  |  |  | 1.16 | 1.36 | 5.52 |
| *H. hygomii* | 0.59 |  |  |  | 2.12 |  |  |  | 1.57 | 1.10 | 7.47 |
| *L. macdonaldi* | 2.26 |  |  |  | 2.09 |  |  |  | 1.61 | 1.17 | 7.67 |
| *L. dofleini* | 0.20 |  |  |  | 1.67 |  |  |  | 1.22 | 1.05 | 5.80 |
| *M. punctatum* | 2.65 | 2.71 | 1.33 | 3.31 | 0.89 |  |  |  | 1.68 | 1.63 | 8.00 |
| *N. kroyeri* | 1.53 |  |  |  | 1.17 |  |  |  | 1.11 | 1.33 | 5.27 |
| *N. resplendens* | 0.89 |  |  |  | 1.59 |  |  |  | 1.28 | 1.13 | 6.08 |
| *Scopelo. beanii* | 5.28 | 7.19 | 4.60 | 8.79 | 6.64 | 9.20 | 9.56 | 11.32 | 1.26 | 1.42 | 6.00 |
| *A. cornuta* | 2.75 | 2.42 | 0.81 | 2.96 | 2.85 | 2.33 | 0.73 | 2.87 | 1.87 | 1.19 | 8.89 |
| *M. atlanticum* | 1.61 |  |  |  | 0.12 |  |  |  | 1.23 | 1.35 | 5.83 |

Similarities and dissimilarities are presented only for those species which contributed to 90% of the respective total.

Supplementary Table 4 : Average catches, in numbers and weights (grams) (both ln (X+1) transformed) taken by sets that fished to
1,250 m depth or deeper on the Deep or Offshore stations

|  | **Numbers** | | **Weights** | |
| --- | --- | --- | --- | --- |
|  | Deep | Offshore | Deep | Offshore |
| **Species:** | Average | Average | Average | Average |
| *N. scolopaceus* | 2.64 | 1.68 | 4.91 | 3.12 |
| *Serrivom. beanii* | 3.86 | 3.49 | 6.63 | 6.42 |
| *E. pelecanoides* | 1.81 | 2.18 | 4.63 | 5.52 |
| *B. euryops* | 2.85 | 2.04 | 5.28 | 4.44 |
| *C. sloani* | 3.51 | 2.93 | 6.11 | 5.74 |
| *M. niger* | 1.34 | 0.83 | 3.62 | 3.01 |
| *S. boa* | 2.87 | 2.62 | 5.18 | 4.93 |
| *A. risso* | 2.20 | 3.24 | 2.50 | 3.79 |
| *B. glaciale* | 5.94 | 6.10 | 6.22 | 6.64 |
| *C. maderensis* | 1.49 | 1.19 | 1.90 | 0.81 |
| *H. hygomii* | 1.86 | 3.64 | 2.12 | 4.24 |
| *L. macdonaldi* | 1.03 | 0.54 | 2.09 | 1.21 |
| *L. dofleini* | 2.04 | 2.33 | 1.67 | 1.98 |
| *M. punctatum* | 0.89 | 0.83 | 0.89 | 0.60 |
| *N. kroyeri* | 1.23 | 0 | 1.17 | 0 |
| *N. resplendens* | 1.58 | 4.07 | 1.59 | 4.42 |
| *Scopelo. beanii* | 3.71 | 2.40 | 6.64 | 5.36 |
| *A. cornuta* | 0.58 | 0.23 | 2.85 | 1.42 |
| *M. atlanticum* | 0.06 | 0 | 0.12 | 0 |

Supplementary Table 5 : SIMPER comparison of late summer and early spring catches (ln (X+1) transformed) by sets that fished to 750 m depth (A: numbers, B: weight, in grams)

| **A** | **Summer**  Average Similarity = 67.11 | | | | **Spring**  Average Similarity = 58.60 | | | | **Comparison**  Average Dissimilarity = 46.18 | | |
| --- | --- | --- | --- | --- | --- | --- | --- | --- | --- | --- | --- |
| **Species:** | Average | Average Similarity | Sim / SD | Contribution (%) | Average | Average Similarity | Sim / SD | Contribution (%) | Average Dissimilarity | Diss / SD | Contribution (%) |
| *N. scolopaceus* | 1.88 | 3.70 | 1.18 | 5.51 | 2.32 | 11.90 | 2.69 | 20.30 | 2.45 | 1.10 | 5.31 |
| *Serrivom. beanii* | 2.53 | 7.07 | 3.93 | 10.54 | 2.50 | 9.51 | 1.93 | 16.22 | 2.24 | 1.04 | 4.85 |
| *E. pelecanoides* | 0.57 |  |  |  | 0.61 |  |  |  | 1.56 | 1.07 | 3.37 |
| *B. euryops* | 2.03 | 5.58 | 2.31 | 8.32 | 1.60 | 4.97 | 1.32 | 8.48 | 2.24 | 1.05 | 4.84 |
| *C. sloani* | 1.91 | 3.95 | 1.70 | 5.88 | 2.11 | 7.14 | 1.68 | 12.19 | 2.79 | 1.38 | 6.04 |
| *M. niger* | 0.96 | 1.90 | 0.99 | 2.83 | 0.84 |  |  |  | 1.73 | 1.17 | 3.74 |
| *S. boa* | 2.69 | 6.41 | 1.63 | 9.54 | 1.39 | 3.54 | 0.98 | 6.04 | 3.82 | 1.35 | 8.27 |
| *A. risso* | 2.46 | 6.80 | 2.94 | 10.13 | 1.01 | 2.57 | 0.95 | 4.39 | 3.52 | 1.44 | 7.61 |
| *B. glaciale* | 5.58 | 16.69 | 6.20 | 24.86 | 3.99 | 13.18 | 1.52 | 22.50 | 5.06 | 0.94 | 10.95 |
| *C. maderensis* | 1.65 | 2.89 | 1.05 | 4.31 | 0.29 |  |  |  | 3.09 | 1.25 | 6.69 |
| *H. hygomii* | 0.88 |  |  |  | 0 |  |  |  | 1.56 | 0.58 | 3.37 |
| *L. macdonaldi* | 0.76 |  |  |  | 0.21 |  |  |  | 1.80 | 0.82 | 3.89 |
| *L. dofleini* | 0.70 |  |  |  | 0.06 |  |  |  |  |  |  |
| *M. punctatum* | 2.12 | 4.89 | 1.47 | 7.29 | 0 |  |  |  | 4.55 | 1.73 | 9.85 |
| *N. kroyeri* | 1.23 | 1.67 | 0.68 | 2.49 | 0 |  |  |  | 2.52 | 0.99 | 5.46 |
| *N. resplendens* | 0.78 |  |  |  | 0 |  |  |  |  |  |  |
| *Scopelo. beanii* | 1.01 |  |  |  | 0.98 |  |  |  | 2.21 | 1.24 | 4.79 |
| *A. cornuta* | 0.19 |  |  |  | 0.12 |  |  |  |  |  |  |
| *M. atlanticum* | 0.82 |  |  |  | 0.29 |  |  |  | 1.90 | 0.94 | 4.12 |

| **B** | **Summer**  Average Similarity = 70.15 | | | | **Spring**  Average Similarity = 62.17 | | | | **Comparison**  Average Dissimilarity = 41.26 | | |
| --- | --- | --- | --- | --- | --- | --- | --- | --- | --- | --- | --- |
| **Species:** | Average | Average Similarity | Sim / SD | Contribution (%) | Average | Average Similarity | Sim / SD | Contribution (%) | Average Dissimilarity | Diss / SD | Contribution (%) |
| *N. scolopaceus* | 4.19 | 5.83 | 1.40 | 8.31 | 4.78 | 13.54 | 3.08 | 21.59 | 2.20 | 0.91 | 5.34 |
| *Serrivom. beanii* | 5.25 | 9.49 | 6.32 | 13.53 | 4.73 | 10.98 | 2.02 | 17.52 | 1.76 | 0.75 | 4.27 |
| *E. pelecanoides* | 1.20 |  |  |  | 1.36 |  |  |  | 1.97 | 1.08 | 4.76 |
| *B. euryops* | 3.45 | 5.65 | 2.59 | 8.06 | 3.34 | 6.50 | 1.34 | 10.36 | 1.97 | 1.04 | 4.78 |
| *C. sloani* | 4.24 | 6.62 | 2.08 | 9.43 | 4.23 | 8.94 | 2.04 | 14.26 | 2.29 | 1.03 | 5.54 |
| *M. niger* | 2.68 | 3.13 | 0.97 | 4.46 | 2.37 | 3.10 | 0.81 | 4.94 | 2.60 | 1.19 | 6.29 |
| *S. boa* | 5.12 | 8.06 | 1.83 | 11.49 | 2.96 | 4.82 | 1.05 | 7.69 | 3.74 | 1.29 | 9.07 |
| *A. risso* | 3.66 | 6.25 | 2.89 | 8.90 | 1.45 | 2.44 | 0.81 | 3.89 | 2.89 | 1.57 | 7.00 |
| *B. glaciale* | 5.91 | 10.74 | 7.86 | 15.32 | 4.02 | 7.66 | 1.54 | 12.21 | 2.88 | 0.95 | 6.99 |
| *C. maderensis* | 2.18 | 2.53 | 1.10 | 3.60 | 0.44 |  |  |  | 2.38 | 1.33 | 5.78 |
| *H. hygomii* | 0.99 |  |  |  | 0 |  |  |  |  |  |  |
| *L. macdonaldi* | 1.63 |  |  |  | 0.45 |  |  |  | 2.07 | 0.94 | 5.01 |
| *L. dofleini* | 0.53 |  |  |  | 0.09 |  |  |  |  |  |  |
| *M. punctatum* | 2.95 | 4.27 | 1.44 | 6.09 | 0 |  |  |  | 3.64 | 1.82 | 8.81 |
| *N. kroyeri* | 1.66 |  |  |  | 0 |  |  |  | 1.98 | 1.07 | 4.80 |
| *N. resplendens* | 0.83 |  |  |  | 0 |  |  |  |  |  |  |
| *Scopelo. beanii* | 2.17 | 1.58 | 0.59 | 2.26 | 2.08 |  |  |  | 2.78 | 1.25 | 6.74 |
| *A. cornuta* | 1.01 |  |  |  | 0.67 |  |  |  | 1.52 | 0.70 | 3.69 |
| *M. atlanticum* | 1.39 |  |  |  | 0.76 |  |  |  | 1.91 | 1.01 | 4.64 |

Similarities and dissimilarities are presented only for those species which contributed to 90% of the respective total.

Supplementary Table 6 : SIMPER comparison of catches (ln (X+1) transformed)
on the Head and Main stations by sets that fished to 750 m depth
(A: numbers, B: weight, in grams)

| **A** | **Head Station**  Average Similarity = 54.47 | | | | **Main Station**  Average Similarity = 73.65 | | | | **Comparison**  Average Dissimilarity = 46.46 | | |
| --- | --- | --- | --- | --- | --- | --- | --- | --- | --- | --- | --- |
| **Species:** | Average | Average Similarity | Sim / SD | Contribution (%) | Average | Average Similarity | Sim / SD | Contribution (%) | Average Dissimilarity | Diss / SD | Contribution (%) |
| *N. scolopaceus* | 0.81 | 2.13 | 0.38 | 3.90 | 2.30 | 6.52 | 2.97 | 8.86 | 3.60 | 1.82 | 7.74 |
| *Serrivom. beanii* | 1.82 | 7.31 | 1.92 | 13.41 | 2.63 | 8.87 | 4.81 | 12.05 | 2.17 | 0.96 | 4.66 |
| *E. pelecanoides* | 0.95 | 2.78 | 0.76 | 5.11 | 0.34 |  |  |  | 1.90 | 1.39 | 4.09 |
| *B. euryops* | 1.63 | 5.26 | 1.44 | 9.65 | 2.21 | 7.09 | 5.94 | 9.63 | 2.26 | 1.09 | 4.86 |
| *C. sloani* | 0.99 | 3.46 | 1.43 | 6.35 | 1.82 | 4.92 | 1.84 | 6.68 | 2.42 | 1.24 | 5.22 |
| *M. niger* | 0.77 |  |  |  | 0.67 |  |  |  | 1.58 | 1.27 | 3.40 |
| *S. boa* | 0.63 |  |  |  | 2.95 | 8.33 | 3.08 | 11.31 | 5.16 | 2.06 | 11.11 |
| *A. risso* | 1.78 | 5.89 | 1.41 | 10.82 | 2.22 | 5.65 | 2.00 | 7.67 | 2.70 | 1.17 | 5.82 |
| *B. glaciale* | 3.40 | 12.55 | 1.89 | 23.05 | 5.99 | 19.85 | 10.59 | 26.96 | 6.16 | 1.21 | 13.27 |
| *C. maderensis* | 0.48 |  |  |  | 1.72 | 2.97 | 1.04 | 4.04 | 3.29 | 1.27 | 7.08 |
| *H. hygomii* | 0 |  |  |  | 0.30 |  |  |  |  |  |  |
| *L. macdonaldi* | 1.42 | 3.99 | 0.98 | 7.32 | 0.28 |  |  |  | 2.68 | 1.41 | 5.76 |
| *L. dofleini* | 0 |  |  |  | 0.28 |  |  |  |  |  |  |
| *M. punctatum* | 1.26 | 2.88 | 0.76 | 5.28 | 1.97 | 3.54 | 0.87 | 4.80 | 3.51 | 1.28 | 7.56 |
| *N. kroyeri* | 0.40 |  |  |  | 1.45 |  |  |  | 2.85 | 1.13 | 6.15 |
| *N. resplendens* | 0 |  |  |  | 0.29 |  |  |  |  |  |  |
| *Scopelo. beanii* | 0.32 |  |  |  | 0.68 |  |  |  |  |  |  |
| *A. cornuta* | 0.09 |  |  |  | 0.08 |  |  |  |  |  |  |
| *M. atlanticum* | 1.39 | 4.68 | 1.74 | 8.60 | 0.54 |  |  |  | 2.53 | 1.45 | 5.45 |

| **B** | **Head Station**  Average Similarity = 56.45 | | | | **Main Station**  Average Similarity = 74.72 | | | | **Comparison**  Average Dissimilarity = 41.62 | | |
| --- | --- | --- | --- | --- | --- | --- | --- | --- | --- | --- | --- |
| **Species:** | Average | Average Similarity | Sim / SD | Contribution (%) | Average | Average Similarity | Sim / SD | Contribution (%) | Average Dissimilarity | Diss / SD | Contribution (%) |
| *N. scolopaceus* | 2.05 | 2.54 | 0.43 | 4.50 | 5.31 | 10.23 | 7.00 | 13.69 | 4.16 | 1.75 | 10.00 |
| *Serrivom. beanii* | 4.48 | 9.50 | 2.19 | 16.83 | 5.34 | 10.75 | 7.86 | 14.39 |  |  |  |
| *E. pelecanoides* | 1.96 |  |  |  | 0.94 |  |  |  | 2.22 | 1.21 | 5.34 |
| *B. euryops* | 2.88 | 5.13 | 1.46 | 9.09 | 3.79 | 7.25 | 4.40 | 9.71 | 1.89 | 0.93 | 4.53 |
| *C. sloani* | 3.36 | 6.31 | 1.49 | 11.17 | 4.01 | 7.03 | 2.14 | 9.41 | 2.18 | 0.97 | 5.23 |
| *M. niger* | 2.43 | 2.52 | 0.64 | 4.46 | 1.83 |  |  |  | 2.69 | 1.41 | 6.46 |
| *S. boa* | 1.82 |  |  |  | 5.64 | 10.33 | 4.53 | 13.83 | 4.92 | 1.73 | 11.82 |
| *A. risso* | 3.46 | 6.72 | 1.55 | 11.90 | 3.13 | 4.72 | 1.79 | 6.32 | 2.14 | 1.11 | 5.13 |
| *B. glaciale* | 3.82 | 7.37 | 1.82 | 13.05 | 6.18 | 12.12 | 16.02 | 16.22 | 3.18 | 1.10 | 7.65 |
| *C. maderensis* | 0.74 |  |  |  | 2.31 | 2.57 | 1.07 | 3.44 | 2.44 | 1.35 | 5.87 |
| *H. hygomii* | 0 |  |  |  | 0.37 |  |  |  |  |  |  |
| *L. macdonaldi* | 2.61 | 3.63 | 0.93 | 6.42 | 0.80 |  |  |  | 2.68 | 1.32 | 6.44 |
| *L. dofleini* | 0 |  |  |  | 0.21 |  |  |  |  |  |  |
| *M. punctatum* | 2.27 | 3.04 | 0.83 | 5.39 | 2.65 | 3.14 | 0.95 | 4.20 | 2.49 | 1.15 | 5.98 |
| *N. kroyeri* | 1.03 |  |  |  | 1.74 |  |  |  | 2.10 | 1.16 | 5.04 |
| *N. resplendens* | 0 |  |  |  | 0.35 |  |  |  |  |  |  |
| *Scopelo. beanii* | 0.56 |  |  |  | 1.56 |  |  |  | 1.96 | 1.00 | 4.71 |
| *A. cornuta* | 0.56 |  |  |  | 0.48 |  |  |  |  |  |  |
| *M. atlanticum* | 2.68 | 4.54 | 1.41 | 8.05 | 0.92 |  |  |  | 2.66 | 1.54 | 6.40 |

Similarities and dissimilarities are presented only for those species which contributed to 90% of the respective total.

Supplementary Table 7 : SIMPER comparison of catches (ln (X+1) transformed)
on the Main and Deep stations by sets that fished to 750 m depth (A: numbers, B: weight, in grams)

| **A** | **Main Station**  Average Similarity = 73.65 | | | | **Deep Station**  Average Similarity = 73.63 | | | | **Comparison**  Average Dissimilarity = 30.88 | | |
| --- | --- | --- | --- | --- | --- | --- | --- | --- | --- | --- | --- |
| **Species:** | Average | Average Similarity | Sim / SD | Contribution (%) | Average | Average Similarity | Sim / SD | Contribution (%) | Average Dissimilarity | Diss / SD | Contribution (%) |
| *N. scolopaceus* | 2.30 | 6.52 | 2.97 | 8.86 | 2.59 | 7.04 | 5.63 | 9.57 | 1.13 | 1.38 | 3.66 |
| *Serrivom. beanii* | 2.63 | 8.87 | 4.81 | 12.05 | 2.95 | 7.21 | 2.85 | 9.79 | 1.15 | 1.19 | 3.73 |
| *E. pelecanoides* | 0.34 |  |  |  | 0.41 |  |  |  |  |  |  |
| *B. euryops* | 2.21 | 7.09 | 5.94 | 9.63 | 2.14 | 5.10 | 2.12 | 6.92 | 0.94 | 1.12 | 3.03 |
| *C. sloani* | 1.82 | 4.92 | 1.84 | 6.68 | 3.08 | 7.75 | 3.91 | 10.52 | 2.15 | 1.69 | 6.95 |
| *M. niger* | 0.67 |  |  |  | 1.19 | 2.26 | 1.09 | 3.07 | 1.36 | 1.32 | 4.41 |
| *S. boa* | 2.95 | 8.33 | 3.08 | 11.31 | 2.99 | 7.64 | 6.01 | 10.38 | 1.37 | 1.11 | 4.44 |
| *A. risso* | 2.22 | 5.65 | 2.00 | 7.67 | 2.37 | 5.26 | 2.40 | 7.14 | 1.65 | 1.17 | 5.35 |
| *B. glaciale* | 5.99 | 19.85 | 10.59 | 26.96 | 5.80 | 16.05 | 5.98 | 21.80 | 0.98 | 1.40 | 3.17 |
| *C. maderensis* | 1.72 | 2.97 | 1.04 | 4.04 | 1.63 | 2.31 | 1.03 | 3.13 | 2.29 | 1.35 | 7.42 |
| *H. hygomii* | 0.30 |  |  |  | 1.87 |  |  |  | 2.74 | 1.03 | 8.87 |
| *L. macdonaldi* | 0.28 |  |  |  | 0.63 |  |  |  | 0.99 | 1.10 | 3.21 |
| *L. dofleini* | 0.28 |  |  |  | 1.23 |  |  |  | 1.81 | 0.89 | 5.85 |
| *M. punctatum* | 1.97 | 3.54 | 0.87 | 4.80 | 1.23 |  |  |  | 2.57 | 1.33 | 8.32 |
| *N. kroyeri* | 1.45 |  |  |  | 0.74 |  |  |  | 2.30 | 1.16 | 7.44 |
| *N. resplendens* | 0.29 |  |  |  | 1.76 |  |  |  | 2.61 | 1.03 | 8.45 |
| *Scopelo. beanii* | 0.68 |  |  |  | 2.37 | 5.66 | 3.29 | 7.69 | 2.68 | 2.29 | 8.67 |
| *A. cornuta* | 0.08 |  |  |  | 0.25 |  |  |  |  |  |  |
| *M. atlanticum* | 0.54 |  |  |  | 0.05 |  |  |  |  |  |  |

| **B** | **Main Station**  Average Similarity = 74.72 | | | | **Deep Station**  Average Similarity = 76.18 | | | | **Comparison**  Average Dissimilarity = 28.38 | | |
| --- | --- | --- | --- | --- | --- | --- | --- | --- | --- | --- | --- |
| **Species:** | Average | Average Similarity | Sim / SD | Contribution (%) | Average | Average Similarity | Sim / SD | Contribution (%) | Average Dissimilarity | Diss / SD | Contribution (%) |
| *N. scolopaceus* | 5.31 | 10.23 | 7.00 | 13.69 | 4.91 | 8.51 | 7.23 | 11.17 |  |  |  |
| *Serrivom. beanii* | 5.34 | 10.75 | 7.86 | 14.39 | 5.38 | 9.13 | 4.74 | 11.99 |  |  |  |
| *E. pelecanoides* | 0.94 |  |  |  | 0.87 |  |  |  | 1.33 | 0.95 | 4.67 |
| *B. euryops* | 3.79 | 7.25 | 4.40 | 9.71 | 3.86 | 5.95 | 2.18 | 7.81 | 1.03 | 1.07 | 3.62 |
| *C. sloani* | 4.01 | 7.03 | 2.14 | 9.41 | 5.19 | 8.70 | 4.08 | 11.42 | 1.51 | 1.15 | 5.32 |
| *M. niger* | 1.83 |  |  |  | 3.02 | 3.82 | 1.15 | 5.02 | 2.07 | 1.33 | 7.30 |
| *S. boa* | 5.64 | 10.33 | 4.53 | 13.83 | 5.41 | 9.25 | 8.52 | 12.14 | 1.18 | 1.11 | 4.15 |
| *A. risso* | 3.13 | 4.72 | 1.79 | 6.32 | 2.67 | 3.77 | 2.35 | 4.95 | 1.47 | 1.30 | 5.17 |
| *B. glaciale* | 6.18 | 12.12 | 16.02 | 16.22 | 6.03 | 10.85 | 8.71 | 14.24 |  |  |  |
| *C. maderensis* | 2.31 | 2.57 | 1.07 | 3.44 | 2.12 | 2.17 | 1.11 | 2.85 | 1.75 | 1.35 | 6.17 |
| *H. hygomii* | 0.37 |  |  |  | 2.06 |  |  |  | 1.97 | 1.03 | 6.94 |
| *L. macdonaldi* | 0.80 |  |  |  | 1.62 |  |  |  | 1.60 | 1.12 | 5.65 |
| *L. dofleini* | 0.21 |  |  |  | 0.93 |  |  |  | 0.89 | 0.78 | 3.15 |
| *M. punctatum* | 2.65 | 3.14 | 0.95 | 4.20 | 1.46 |  |  |  | 2.09 | 1.35 | 7.36 |
| *N. kroyeri* | 1.74 |  |  |  | 0.83 |  |  |  | 1.66 | 1.19 | 5.84 |
| *N. resplendens* | 0.35 |  |  |  | 1.83 |  |  |  | 1.74 | 1.07 | 6.13 |
| *Scopelo. beanii* | 1.56 |  |  |  | 4.91 | 7.44 | 3.44 | 9.77 | 3.42 | 1.96 | 12.04 |
| *A. cornuta* | 0.48 |  |  |  | 1.38 |  |  |  | 1.53 | 0.80 | 5.40 |
| *M. atlanticum* | 0.92 |  |  |  | 0.05 |  |  |  | 0.90 | 0.71 | 3.17 |

Similarities and dissimilarities are presented only for those species which contributed to 90% of the respective total.

Supplementary Table 8 : SIMPER comparison of daylight and night catches
(ln (X+1) transformed) by sets that fished to 250 m depth (A: numbers, B: weight, in grams)

| **A** | **Daylight**  Average Similarity = 31.286 | | | | **Night**  Average Similarity = 49.78 | | | | **Comparison**  Average Dissimilarity = 65.72 | | |
| --- | --- | --- | --- | --- | --- | --- | --- | --- | --- | --- | --- |
| **Species:** | Average | Average Similarity | Sim / SD | Contribution (%) | Average | Average Similarity | Sim / SD | Contribution (%) | Average Dissimilarity | Diss / SD | Contribution (%) |
| *N. scolopaceus* | 0.96 | 4.71 | 0.56 | 15.05 | 1.87 | 6.45 | 1.26 | 12.95 | 5.95 | 1.13 | 9.06 |
| *Serrivom. beanii* | 0.27 |  |  |  | 0.83 |  |  |  | 3.32 | 0.96 | 5.05 |
| *E. pelecanoides* | 0 |  |  |  | 0.13 |  |  |  |  |  |  |
| *B. euryops* | 0 |  |  |  | 0.18 |  |  |  |  |  |  |
| *C. sloani* | 0.14 |  |  |  | 0.96 |  |  |  | 3.30 | 1.03 | 5.02 |
| *M. niger* | 0.14 |  |  |  | 0.04 |  |  |  |  |  |  |
| *S. boa* | 0.62 | 2.67 | 0.48 | 8.53 | 1.54 | 4.53 | 1.15 | 9.10 | 4.92 | 1.32 | 7.48 |
| *A. risso* | 1.08 | 5.72 | 0.62 | 18.27 | 2.33 | 7.47 | 1.56 | 15.01 | 6.87 | 1.38 | 10.45 |
| *B. glaciale* | 1.70 | 9.33 | 0.81 | 29.84 | 4.72 | 17.20 | 1.79 | 34.54 | 13.82 | 1.61 | 21.03 |
| *C. maderensis* | 0.09 |  |  |  | 1.92 | 4.22 | 0.89 | 8.47 | 6.10 | 1.35 | 9.28 |
| *H. hygomii* | 0.29 |  |  |  | 0.64 |  |  |  | 2.38 | 0.60 | 3.63 |
| *L. macdonaldi* | 0.05 |  |  |  | 0.07 |  |  |  |  |  |  |
| *L. dofleini* | 0.25 |  |  |  | 0.61 |  |  |  | 2.29 | 0.62 | 3.48 |
| *M. punctatum* | 1.01 | 5.94 | 0.55 | 18.98 | 1.42 | 3.04 | 0.71 | 6.10 | 5.88 | 1.06 | 8.95 |
| *N. kroyeri* | 0.50 |  |  |  | 1.61 | 2.14 | 0.52 | 4.31 | 5.64 | 0.96 | 8.58 |
| *N. resplendens* | 0.07 |  |  |  | 0.59 |  |  |  |  |  |  |
| *Scopelo. beanii* | 0 |  |  |  | 0.14 |  |  |  |  |  |  |
| *A. cornuta* | 0 |  |  |  | 0 |  |  |  |  |  |  |
| *M. atlanticum* | 0.09 |  |  |  | 0.14 |  |  |  |  |  |  |

| **B** | **Daylight**  Average Similarity = 31.25 | | | | **Night**  Average Similarity = 51.78 | | | | **Comparison**  Average Dissimilarity = 63.47 | | |
| --- | --- | --- | --- | --- | --- | --- | --- | --- | --- | --- | --- |
| **Species:** | Average | Average Similarity | Sim / SD | Contribution (%) | Average | Average Similarity | Sim / SD | Contribution (%) | Average Dissimilarity | Diss / SD | Contribution (%) |
| *N. scolopaceus* | 2.23 | 6.98 | 0.58 | 22.32 | 3.95 | 10.69 | 1.43 | 20.65 | 7.55 | 1.06 | 11.89 |
| *Serrivom. beanii* | 0.63 |  |  |  | 1.65 | 2.73 | 0.72 | 5.27 | 4.16 | 1.05 | 6.55 |
| *E. pelecanoides* | 0 |  |  |  | 0.40 |  |  |  |  |  |  |
| *B. euryops* | 0 |  |  |  | 0.54 |  |  |  |  |  |  |
| *C. sloani* | 0.36 |  |  |  | 1.75 | 2.40 | 0.62 | 4.62 | 4.25 | 1.03 | 6.69 |
| *M. niger* | 0.43 |  |  |  | 0.10 |  |  |  | 1.42 | 0.37 | 2.23 |
| *S. boa* | 1.68 | 4.82 | 0.49 | 15.44 | 3.15 | 6.92 | 1.18 | 13.36 | 6.55 | 1.12 | 10.33 |
| *A. risso* | 1.46 | 4.67 | 0.55 | 14.94 | 2.95 | 7.35 | 1.40 | 14.20 | 5.90 | 1.12 | 9.30 |
| *B. glaciale* | 1.66 | 5.67 | 0.75 | 18.15 | 4.64 | 11.79 | 1.75 | 22.76 | 8.96 | 1.60 | 14.12 |
| *C. maderensis* | 0.12 |  |  |  | 2.44 | 4.03 | 0.92 | 7.78 | 5.35 | 1.39 | 8.42 |
| *H. hygomii* | 0.21 |  |  |  | 0.72 |  |  |  | 1.65 | 0.58 | 2.60 |
| *L. macdonaldi* | 0.18 |  |  |  | 0.30 |  |  |  |  |  |  |
| *L. dofleini* | 0.14 |  |  |  | 0.50 |  |  |  |  |  |  |
| *M. punctatum* | 1.66 | 6.19 | 0.56 | 19.80 | 1.86 | 3.01 | 0.67 | 5.82 | 5.23 | 1.05 | 8.44 |
| *N. kroyeri* | 0.79 |  |  |  | 1.61 |  |  |  | 4.17 | 0.94 | 6.57 |
| *N. resplendens* | 0.15 |  |  |  | 0.61 |  |  |  | 1.40 | 0.51 | 2.21 |
| *Scopelo. beanii* | 0 |  |  |  | 0.39 |  |  |  |  |  |  |
| *A. cornuta* | 0 |  |  |  | 0 |  |  |  |  |  |  |
| *M. atlanticum* | 0.32 |  |  |  | 0.35 |  |  |  | 1.79 | 0.54 | 2.82 |

Similarities and dissimilarities are presented only for those species which contributed to 90% of the respective total.

Supplementary Table 9 : Average catches, in numbers and
weights (grams) (both ln (X+1) transformed) taken by sets
made in late summer and early spring that fished to 250 m depth

|  | **Numbers** | | **Weights** | |
| --- | --- | --- | --- | --- |
|  | Summer | Spring | Summer | Spring |
| **Species:** | Average | Average | Average | Average |
| *N. scolopaceus* | 1.37 | 2.34 | 3.08 | 4.54 |
| *Serrivom. beanii* | 0.48 | 1.30 | 1.08 | 2.21 |
| *E. pelecanoides* | 0.07 | 0.15 | 0.18 | 0.63 |
| *B. euryops* | 0.15 | 0 | 0.45 | 0 |
| *C. sloani* | 0.64 | 0.86 | 1.13 | 1.90 |
| *M. niger* | 0.09 | 0 | 0.26 | 0 |
| *S. boa* | 1.29 | 1.01 | 2.87 | 1.85 |
| *A. risso* | 2.06 | 1.35 | 2.79 | 1.11 |
| *B. glaciale* | 3.75 | 3.57 | 3.75 | 3.24 |
| *C. maderensis* | 1.49 | 0.58 | 1.88 | 0.81 |
| *H. hygomii* | 0.66 | 0 | 0.69 | 0 |
| *L. macdonaldi* | 0.06 | 0.08 | 0.25 | 0.31 |
| *L. dofleini* | 0.61 | 0 | 0.48 | 0 |
| *M. punctatum* | 1.60 | 0 | 2.24 | 0 |
| *N. kroyeri* | 1.53 | 0.08 | 1.59 | 0.36 |
| *N. resplendens* | 0.52 | 0 | 0.57 | 0 |
| *Scopelo. beanii* | 0.08 | 0.15 | 0.22 | 0.42 |
| *A. cornuta* | 0 | 0 | 0 | 0 |
| *M. atlanticum* | 0.10 | 0.23 | 0.27 | 0.64 |

Supplementary Table 10 : Average catches, in numbers and
weights (grams) (both ln (X+1) transformed) taken on the
Head and Main stations by sets that fished to 250 m depth

|  | **Numbers** | | **Weights** | |
| --- | --- | --- | --- | --- |
|  | Head | Main | Head | Main |
| **Species:** | Average | Average | Average | Average |
| *N. scolopaceus* | 0.78 | 1.79 | 1.98 | 4.17 |
| *Serrivom. beanii* | 0.48 | 0.50 | 1.15 | 1.02 |
| *E. pelecanoides* | 0.14 | 0 | 0.55 | 0 |
| *B. euryops* | 0.05 | 0.09 | 0.27 | 0.28 |
| *C. sloani* | 0.41 | 0.29 | 1.18 | 0.47 |
| *M. niger* | 0.05 | 0.09 | 0.16 | 0.29 |
| *S. boa* | 0.56 | 1.28 | 1.57 | 2.66 |
| *A. risso* | 0.83 | 2.38 | 1.56 | 2.88 |
| *B. glaciale* | 1.76 | 4.80 | 1.65 | 4.77 |
| *C. maderensis* | 0.23 | 1.64 | 0.33 | 2.08 |
| *H. hygomii* | 0 | 0.14 | 0 | 0.17 |
| *L. macdonaldi* | 0.05 | 0.05 | 0.20 | 0.18 |
| *L. dofleini* | 0 | 0.30 | 0 | 0.21 |
| *M. punctatum* | 0.81 | 1.62 | 1.44 | 2.23 |
| *N. kroyeri* | 0.38 | 1.61 | 0.89 | 1.51 |
| *N. resplendens* | 0 | 0.23 | 0 | 0.32 |
| *Scopelo. beanii* | 0 | 0 | 0 | 0 |
| *A. cornuta* | 0 | 0 | 0 | 0 |
| *M. atlanticum* | 0.30 | 0.05 | 0.85 | 0.15 |
